# Supplementary material for: Optimization of a Cefuroxime Axetil-Loaded Liquid Self-Nanoemulsifying Drug Delivery System: Enhanced Solubility, Dissolution and Caco-2 Cell Uptake
Source: MDPI journal article supplement (doi:10.3390/pharmaceutics14040772), 2022-04-01
Supplement: s1 [file s1]

# Optimization of a Cefuroxime Axetil-Loaded Liquid Self-Nanoemulsifying Drug Delivery System: Enhanced Solubility, Dissolution and Caco-2 Cell Uptake

Arshad Ali Khan, Akhtar Atiya, Safia Akhtar, Yogesh Yadav, Kamal A. Qureshi, Mariusz Jaremko and Syed Mahmood

**Table S1.** The HPLC results of CA uptake in Caco-2 cells after 0.5 mM CA was applied ( $n = 3$ ; mean  $\pm$  SD).

| CA-suspension | Time (min) | HPLC Peak Area |          |          |
|---------------|------------|----------------|----------|----------|
|               |            | Sample 1       | Sample 2 | Sample 3 |
|               | 60         | 1988           | 2512     | 2900     |
|               | 120        | 2694           | 3150     | 3469     |
|               | 180        | 4108           | 4313     | 4791     |
|               | 240        | 4586           | 5361     | 5748     |
| CA-SNEDDS-C3  | Time (min) | HPLC Peak Area |          |          |
|               |            | Sample 1       | Sample 2 | Sample 3 |
|               | 60         | 3150           | 3766     | 4062     |
|               | 120        | 4290           | 4928     | 5224     |
|               | 180        | 6728           | 7230     | 5931     |
|               | 240        | 7708           | 8848     | 9122     |

**Table S2.** CA concentration ( $\mu\text{g/ml}$ ) analyzed from HPLC data after cellular uptake ( $n = 3$ ; mean  $\pm$  SD).

| CA-suspension | Time (min) | CA ( $\mu\text{g/mL}$ ) |          |          | Avg   | STD  |
|---------------|------------|-------------------------|----------|----------|-------|------|
|               |            | Sample 1                | Sample 2 | Sample 3 |       |      |
|               | 60         | 8.6                     | 10.9     | 12.6     | 10.70 | 2.01 |
|               | 120        | 11.7                    | 13.7     | 15.1     | 13.50 | 1.71 |
|               | 180        | 17.9                    | 18.8     | 20.9     | 19.20 | 1.54 |
|               | 240        | 20                      | 23.4     | 25.1     | 22.83 | 2.60 |
| CA-SNEDDS-C3  | Time (min) | CA ( $\mu\text{g/mL}$ ) |          |          | Avg   | STD  |
|               |            | Sample 1                | Sample 2 | Sample 3 |       |      |
|               | 60         | 13.7                    | 16.4     | 17.7     | 15.93 | 2.04 |
|               | 120        | 18.7                    | 21.5     | 22.8     | 21.00 | 2.10 |
|               | 180        | 29.4                    | 31.6     | 25.9     | 28.97 | 2.87 |
|               | 240        | 33.7                    | 38.7     | 39.9     | 37.43 | 3.29 |
